# Supplementary material
Source: PubMed Central journal article supplement (PMC4172390)
Supplement: Supp_Fig1.pdf [file Supp_Fig1.pdf]

**A**

| One-way analysis of variance            |          |
|-----------------------------------------|----------|
| P value                                 | < 0.0001 |
| P value summary                         | ***      |
| Are means signif. different? (P < 0.05) | Yes      |
| Number of groups                        | 4        |
| F                                       | 16.93    |
| R square                                | 0.1210   |

| Bonferroni's Multiple Comparison Test                                | Mean Diff. | t      | Significant? P < 0.05? | Summary | 95% CI of diff.  |
|----------------------------------------------------------------------|------------|--------|------------------------|---------|------------------|
| Male SHIP <sup>flx/flx</sup> vs Male OsxCreSHIP <sup>flx/flx</sup>   | 2.797      | 3.961  | Yes                    | ***     | 1.099 to 4.495   |
| Male OsxCreSHIP <sup>flx/flx</sup> vs Female SHIP <sup>flx/flx</sup> | 0.6060     | 0.9426 | No                     | ns      | -0.9401 to 2.152 |
| Female SHIP <sup>flx/flx</sup> vs Female OsxSHIP <sup>flx/flx</sup>  | 1.693      | 2.559  | Yes                    | *       | 0.1020 to 3.284  |

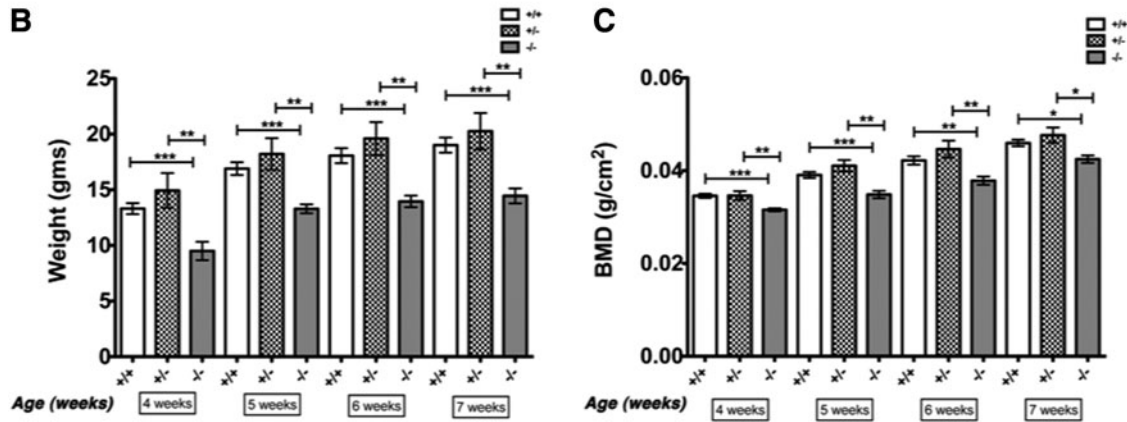

**SUPPLEMENTARY FIG. S1.** MSC and osteolineage progenitors (MS/PC)-specific ablation of Src homology 2-domain-containing inositol 5'-phosphatase 1 (SHIP1) expression retards growth and reduces bone mass. **(A)** ANCOVA followed by post hoc Bonferroni's Multiple Comparison Test to analyze differences in growth retardation in OSXCreSHIP<sup>flx/flx</sup> in comparison to SHIP<sup>flx/flx</sup>. **(B)** Body weight and **(C)** whole-body bone mineral density (BMD) by DEXA analysis of 4–7-week-old SHIP<sup>flx/flx</sup> (+/+), OSXCreSHIP<sup>flx/+</sup> (+/-) and OSXCreSHIP<sup>flx/flx</sup> (-/-) mice; ( $n \geq 6$ ,  $\pm$  SEM \*\*\* $P \leq 0.0001$ , \*\* $P \leq 0.001$  and \* $P \leq 0.05$  Student's unpaired, two-tailed  $t$ -test). Note: Data represent pooled male and female SHIP<sup>flx/flx</sup> (+/+), OSXCreSHIP<sup>flx/+</sup> (+/-) and OSXCreSHIP<sup>flx/flx</sup> (-/-) mice. No significant differences were observed in both weight and whole-body BMD in age-matched male or female SHIP<sup>flx/flx</sup> and OSXCreSHIP<sup>flx/+</sup> mice.
