# Supplementary material
Source: PubMed Central journal article supplement (PMC4172390)
Supplement: Supp_Fig3.pdf [file Supp_Fig3.pdf]

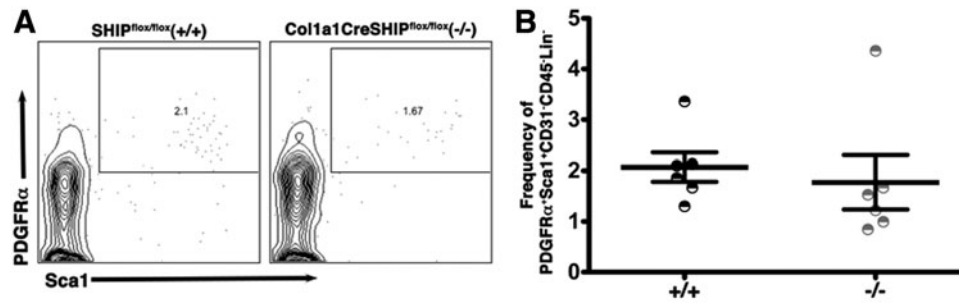

**SUPPLEMENTARY FIG. S3.** Mature osteoblasts-specific ablation of SHIP1 expression does not promote MSC expansion in vivo. No difference was observed in the expression of PDGFR $\alpha$ <sup>+</sup>Sca1<sup>+</sup> MSC (Lin<sup>-</sup>CD45<sup>-</sup>CD31<sup>-</sup>PDGFR $\alpha$ <sup>+</sup>Sca1<sup>+</sup>) in 8–10-week-old SHIP<sup>flox/flox</sup> (+/+) and Col1a1CreSHIP<sup>flox/flox</sup> mice (-/-) by flow cytometry. **(A)** Representative contour plots of PDGFR $\alpha$ <sup>+</sup>Sca1<sup>+</sup> MSC frequency among CD31<sup>-</sup>CD45<sup>-</sup>Lin<sup>-</sup> cells and **(B)** Bar graph indicating no difference in P $\alpha$ <sup>+</sup>Sca1<sup>+</sup> MSC frequency in Col1a1CreSHIP<sup>flox/flox</sup> mice (-/-) versus SHIP<sup>flox/flox</sup> controls (+/+) ( $n=6$  mice).
