# Supplementary material
Source: PubMed Central journal article supplement (PMC4172390)
Supplement: Supp_Table1.pdf [file Supp_Table1.pdf]

## Supplementary Data

SUPPLEMENTARY TABLE S1. OBSERVATIONAL TABLE CHARTING BINOMIAL EXACT ANALYSIS ON OSXCreSHIP<sup>FLOX/FLOX</sup> AND SHIP<sup>FLOX/FLOX</sup> PROGENY BIRTH FREQUENCIES DERIVED FROM PAIRINGS OF OSXCreSHIP<sup>FLOX/FLOX</sup> AND SHIP<sup>FLOX/FLOX</sup> PARTNERS

| <i>Total progeny</i> | <i>Genotype</i>                                              | <i>Expected</i> | <i>Observed</i> | <i>Binomial exact value</i> |
|----------------------|--------------------------------------------------------------|-----------------|-----------------|-----------------------------|
| 150                  | OSXCreSHIP <sup>flox/flox</sup><br>SHIP <sup>flox/flox</sup> | 75<br>75        | 48<br>102       | 8.43349E-06                 |

Data represent pooled male and female SHIP<sup>flox/flox</sup> and OSXCreSHIP<sup>flox/flox</sup> mice.
